# Supplementary material
Source: PubMed Central journal article supplement (PMC4706178)
Supplement: NIHMS679625-supplement-3.pdf [file NIHMS679625-supplement-3.pdf]

**A**

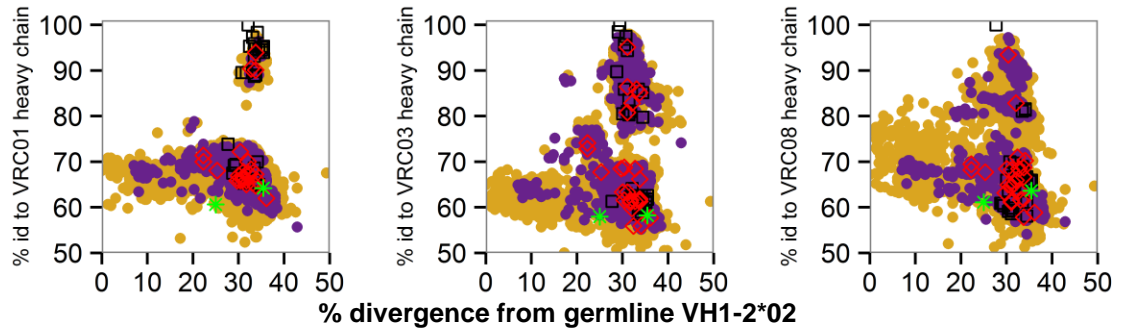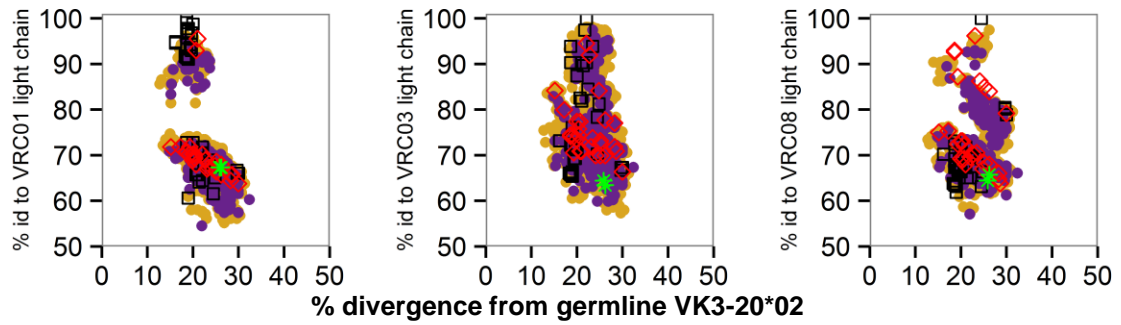

- Sequences in accepted groups
- Final curated sequences
- Probe-identified antibodies
- ◇ Functionally validated NGS-derived neutralizing sequences
- \* Potentially unrelated neutralizers

**B**

|                         | VRC01-like Sequences | Non-VRC01-like Sequences |
|-------------------------|----------------------|--------------------------|
| With Cys98 or Cys99     | 1,035                | 4,641                    |
| Without Cys98 and Cys99 | 6                    | 104,223                  |

Percentage of VRC01-like sequences with Cys98 or Cys99: 99.4%

Percentage of Non VRC01-like VH1-2-derived sequences with Cys98 or Cys99: 4.5%

chi-square with Yates' correction:  $P < 0.0001$
