# Supplementary material
Source: PubMed Central journal article supplement (PMC4706178)
Supplement: NIHMS679625-supplement-5.pdf [file NIHMS679625-supplement-5.pdf]

**A** 45-VRC01.H01+07.O-863513/45-VRC01.L01+07.O-110653<sub>93TH057</sub>

NIH45-46<sub>93TH057</sub>

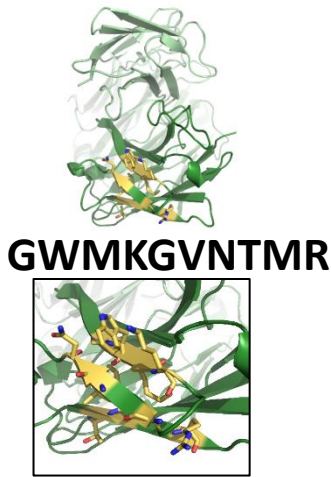

Light chain

Heavy chain

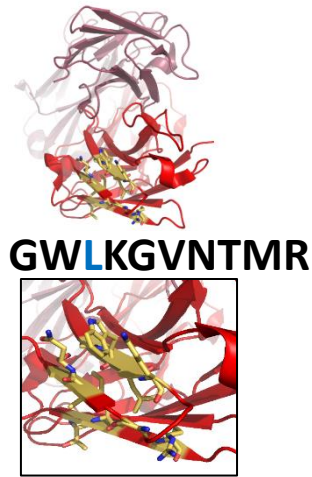

**B**

| Proteins compared                                                                                                                                 | Rmsd (Å) | Contact surface overlap (Å <sup>2</sup> ) |
|---------------------------------------------------------------------------------------------------------------------------------------------------|----------|-------------------------------------------|
| <b>Antibodies</b>                                                                                                                                 |          |                                           |
| 45-VRC01.H01+07.O-863513/45-VRC01.L01+07.O-110653 <sub>d45-01dG5</sub><br>to 45-VRC01.H01+07.O-863513/45-VRC01.L01+07.O-110653 <sub>93TH057</sub> | 0.38     | 1053                                      |
| 45-VRC01.H01+07.O-863513/45-VRC01.L01+07.O-110653 <sub>d45-01dG5</sub><br>to NIH45-46 <sub>93TH057</sub>                                          | 0.45     | 1136                                      |
| 45-VRC01.H01+07.O-863513/45-VRC01.L01+07.O-110653 <sub>93TH057</sub> to<br>NIH45-46 <sub>93TH057</sub>                                            | 0.50     | 1177                                      |
| <b>HIV-1 gp120s</b>                                                                                                                               |          |                                           |
| d45-01dG5 <sub>45-VRC01.H01+07.O-863513/45-VRC01.L01+07.O-110653</sub><br>to 93TH057 <sub>45-VRC01.H01+07.O-863513/45-VRC01.L01+07.O-110653</sub> | 0.58     | 1070                                      |
| d45-01dG5 <sub>45-VRC01.H01+07.O-863513/45-VRC01.L01+07.O-110653</sub><br>to 93TH057 <sub>NIH45-46</sub>                                          | 0.57     | 1031                                      |
| 93TH057 <sub>45-VRC01.H01+07.O-863513/45-VRC01.L01+07.O-110653</sub><br>to 93TH057 <sub>NIH45-46</sub>                                            | 0.48     | 1177                                      |

**C**

**VH1-2\*02** QVQLVQSGAEVKKPGASVKVSCKASGYTFRTGYMHWVRQAPGQGLEWMGWINPNSGGTNYAQKFKQGRVTMTSDTSTISLAYMELSLRSDDTAVYYCAR  
**VRC01** (40 mut) -----GQM-----E-MRI--R----E-IDCTLN-I-L---KRP-----LK-RG-AV---RPL-----VYSD--FL--RS-TV-----F-T-GKNCNDYNWDFEH  
**VRC01\_VH-reverted** -----GQM-----E-MRI--R----E-IDCTLN-I-L---KRP-----LK-RG-AV---RPL-----VYSD--FL--RS-TV-----F-T-GKNCNDYNWDFEH

**VK3-20\*01** EIVLTQSPGTLSSLSPGERATLSCRASQSVSSSYLAWYQQKPGQAPRLLIYGASSRATGIPDRFSGSGSGTDFTLTISRLEPEDFAVYYC  
**VRC01** (24 mut) -----T-II---T--YG-ΔΔΔ-----R-----V--SG-T--A-----RW-P-YN---N--SG--G---QQYEF  
**VRC01\_VK-reverted** -----T-II---T--YG-ΔΔΔ-----R-----V--SG-T--A-----RW-P-YN---N--SG--G---QQYEF

|                            | 01dG5 gp120            |                         |                          | 01dC3 gp120            |                         |                          | 01dA12 gp120           |                         |                          |
|----------------------------|------------------------|-------------------------|--------------------------|------------------------|-------------------------|--------------------------|------------------------|-------------------------|--------------------------|
|                            | K <sub>on</sub>        | K <sub>off</sub>        | K <sub>D</sub> (M)       | K <sub>on</sub>        | K <sub>off</sub>        | K <sub>D</sub> (M)       | K <sub>on</sub>        | K <sub>off</sub>        | K <sub>D</sub> (M)       |
| VRC01 VH-reverted          | 4.06 x 10 <sup>4</sup> | 7.45 x 10 <sup>-2</sup> | 1.84 x 10 <sup>-6</sup>  | NB                     | NB                      | NB                       | NB                     | NB                      | NB                       |
| Clade 01+07 member* (1995) | 2.06 x 10 <sup>5</sup> | 2.64 x 10 <sup>-5</sup> | 1.28 x 10 <sup>-10</sup> | 9.11 x 10 <sup>4</sup> | 7.25 x 10 <sup>-6</sup> | 7.96 x 10 <sup>-11</sup> | 1.06 x 10 <sup>5</sup> | 4.50 x 10 <sup>-5</sup> | 4.23 x 10 <sup>-10</sup> |
| VRC07 (2008)               | 2.44 x 10 <sup>5</sup> | 1.69 x 10 <sup>-5</sup> | 6.91 x 10 <sup>-11</sup> | 1.06 x 10 <sup>5</sup> | 6.08 x 10 <sup>-5</sup> | 6.08 x 10 <sup>-10</sup> | 1.67 x 10 <sup>5</sup> | 5.81 x 10 <sup>-7</sup> | 3.49 x 10 <sup>-12</sup> |

\*45-VRC01.H01+07.O-863513/45-VRC01.L01+07.O-110653  
 NB = No binding
