# Supplementary material
Source: PubMed Central journal article supplement (PMC4706178)
Supplement: NIHMS679625-supplement-7.pdf [file NIHMS679625-supplement-7.pdf]

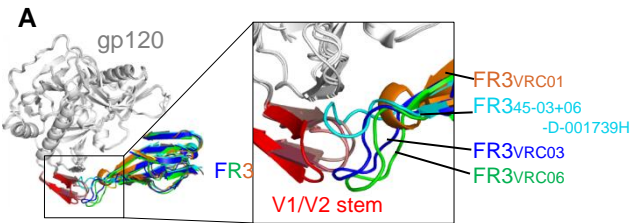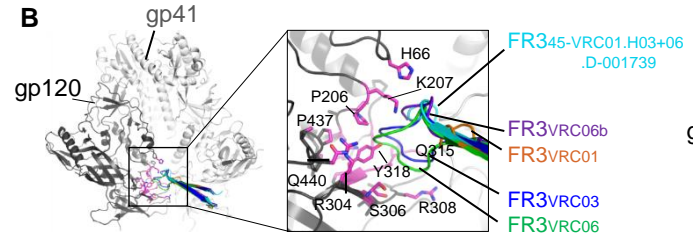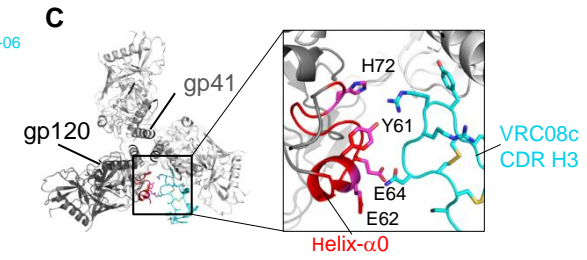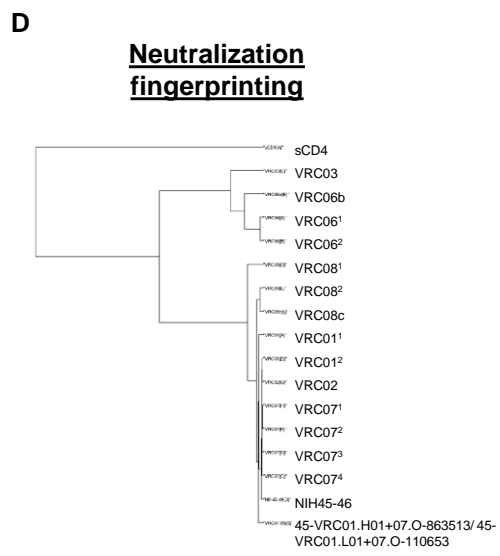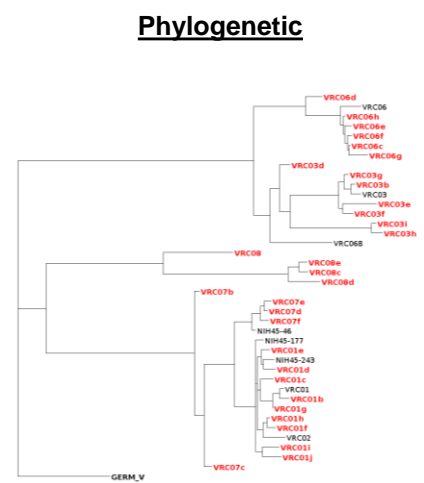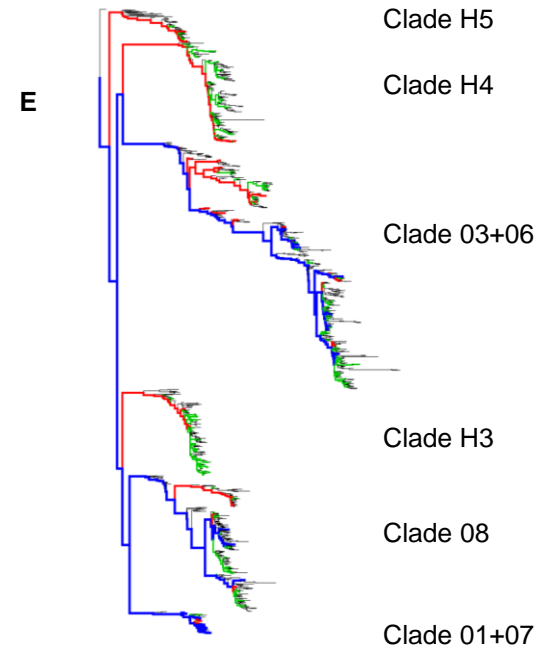

- █ 39 probe-identified neutralizing antibodies: 3 clades; maximum CDRH3 diversity = 62%
- █ 33 functionally validated NGS-derived heavy chain sequences: 6 clades, maximum CDRH3 diversity = 69%
- █ } 1041 curated NGS heavy chain sequences: 6 clades, maximum CDRH3 diversity = 73%
- █ 162 curated NGS heavy chain sequences observed at 2 or more time points
