# Supplementary material
Source: PubMed Central journal article supplement (PMC4706178)

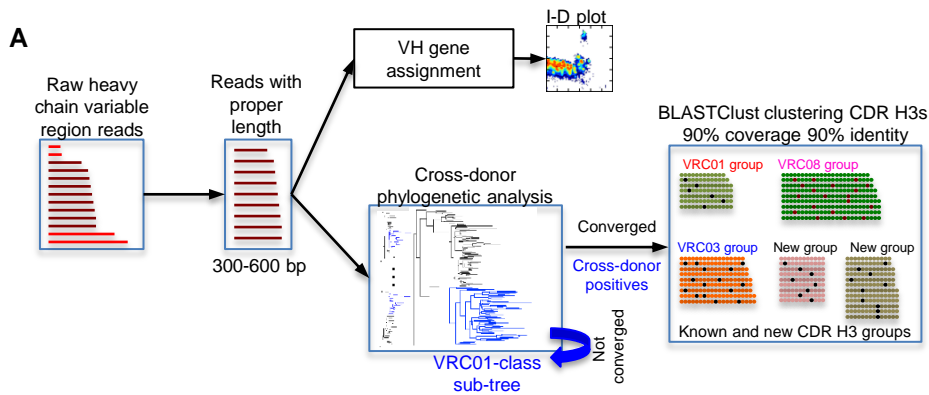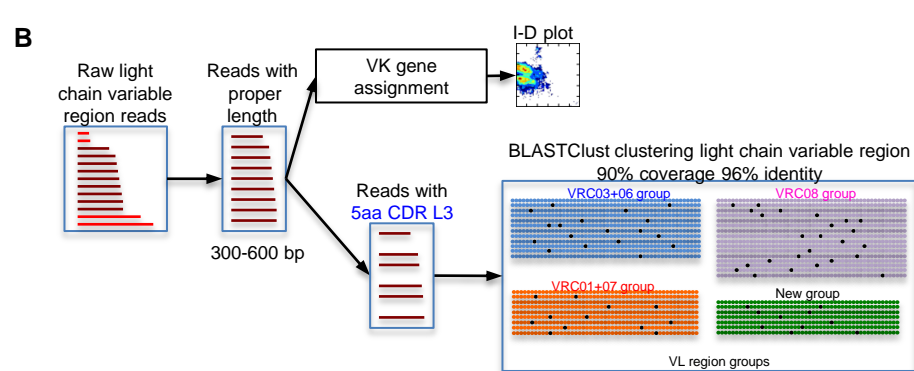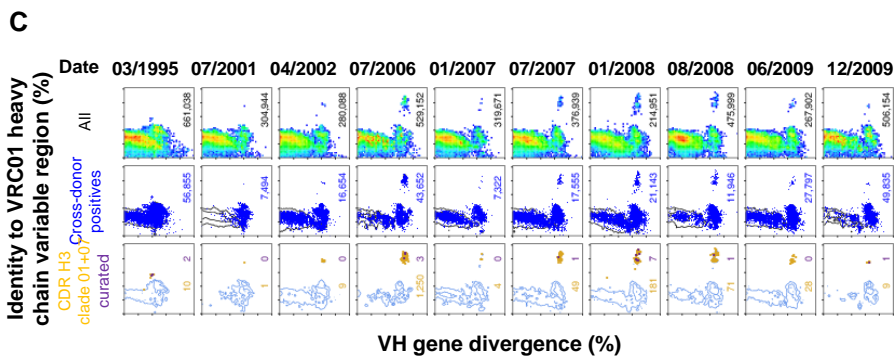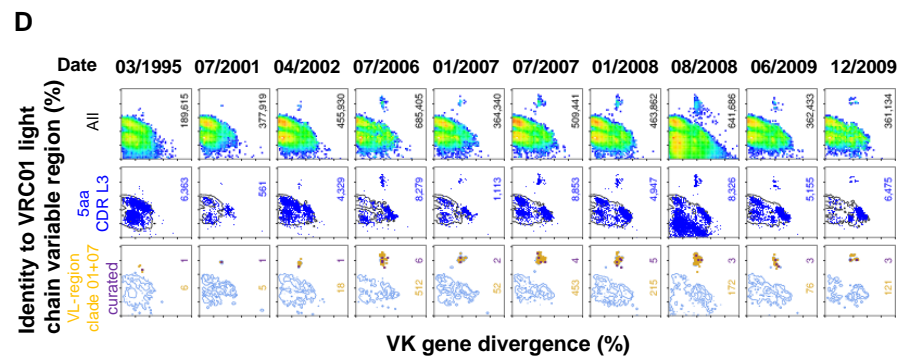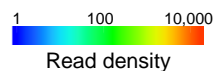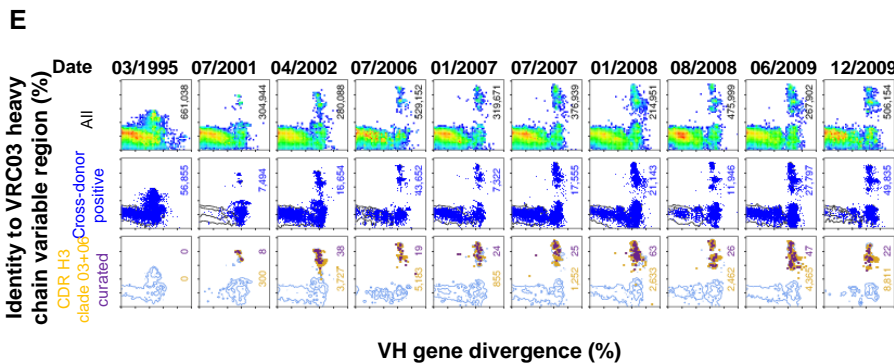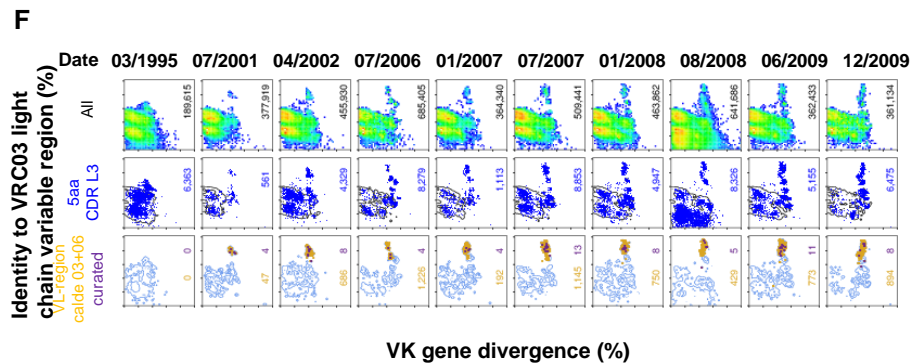

Supplement: NIHMS679625-supplement-2.pdf [file NIHMS679625-supplement-2.pdf]

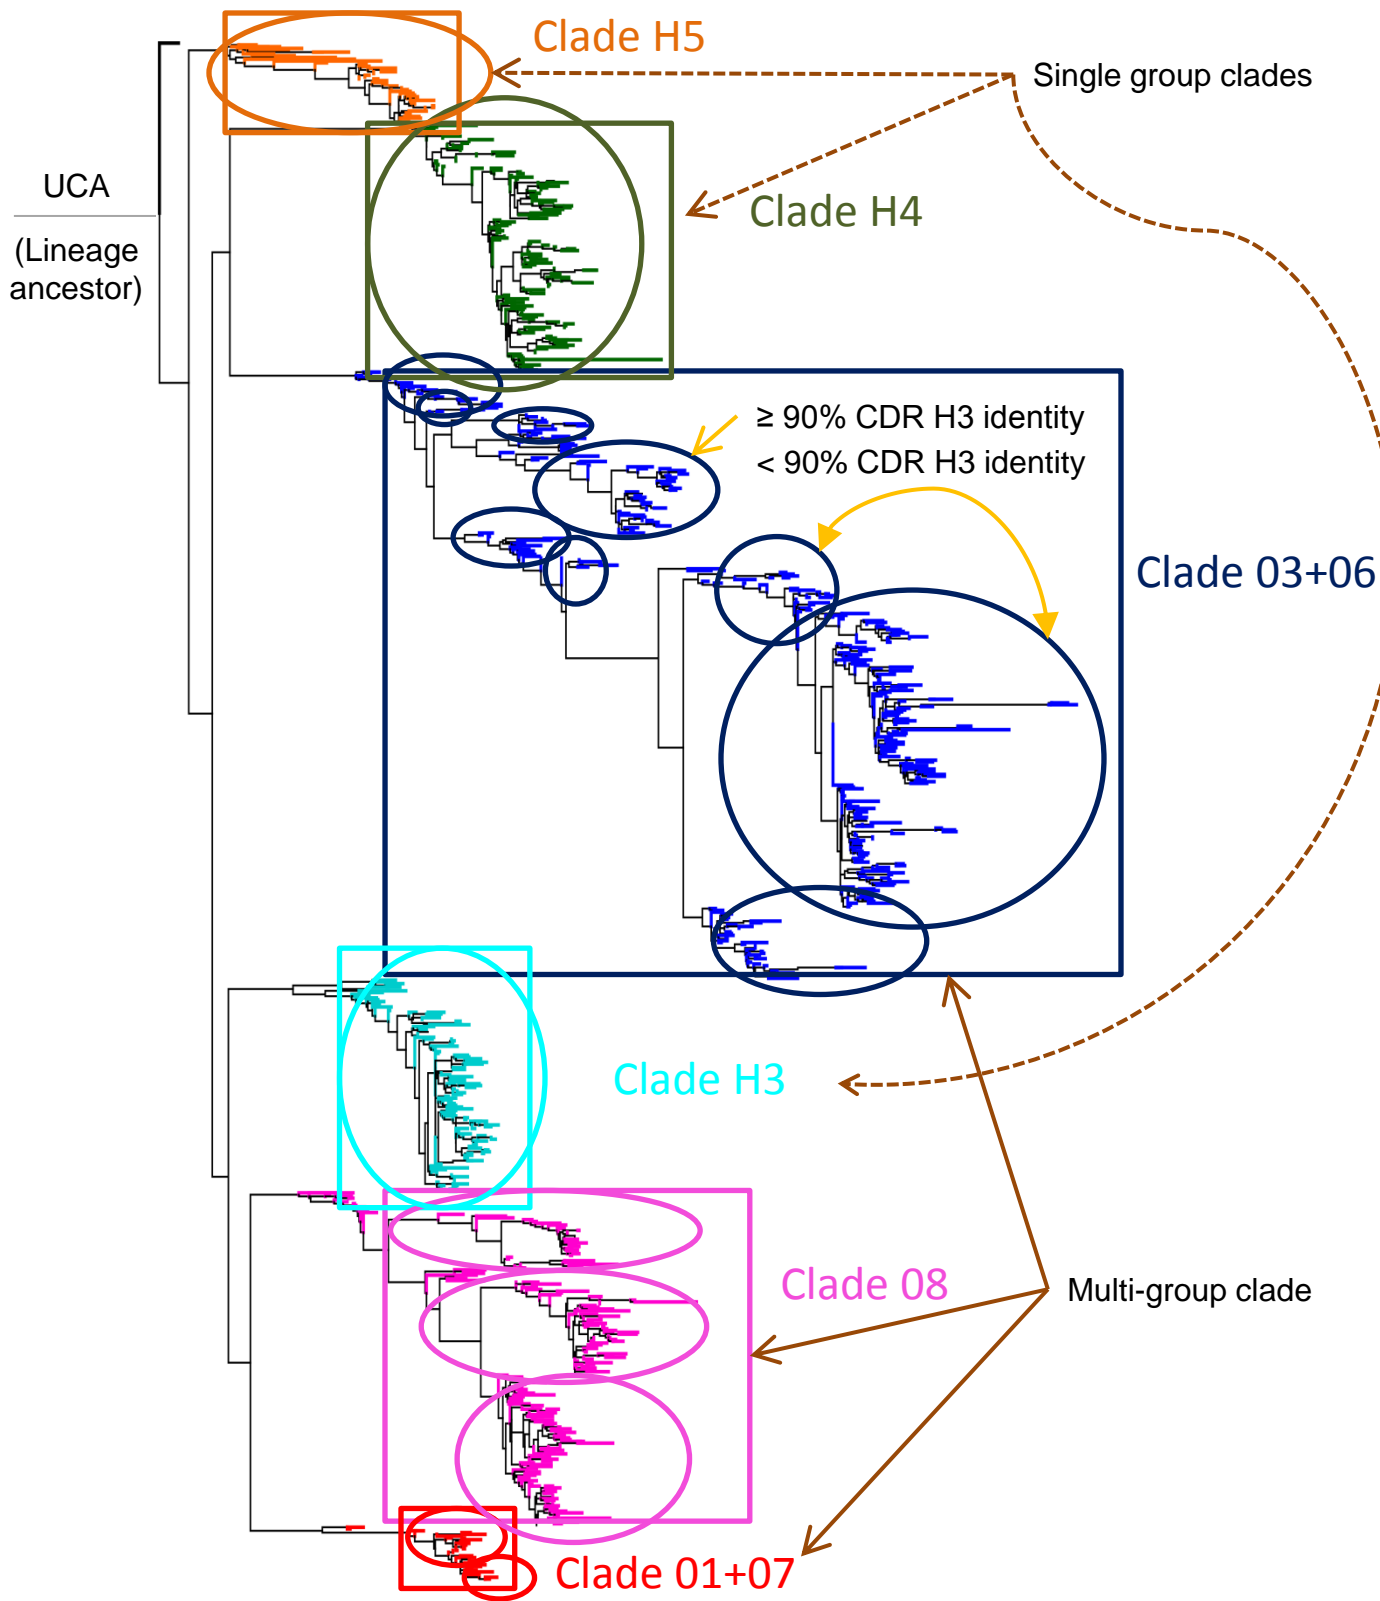

Supplement: NIHMS679625-supplement-4.pdf [file NIHMS679625-supplement-4.pdf]

**A****Average divergence over time**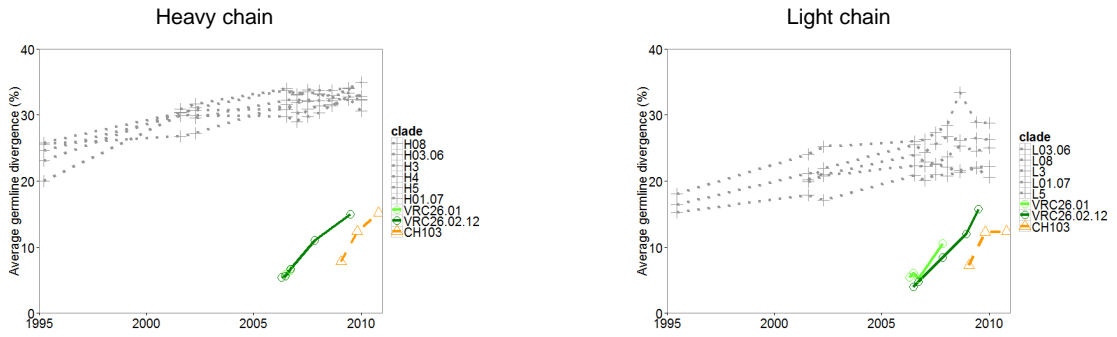**B**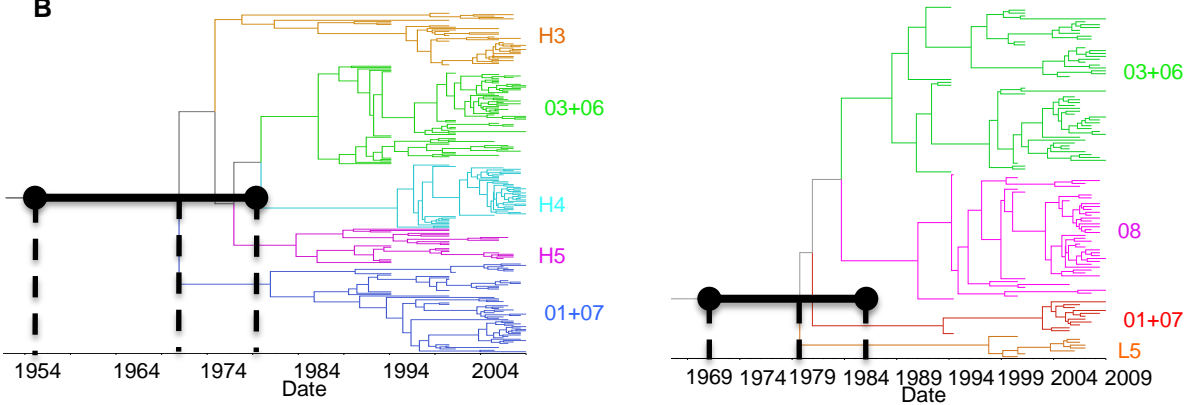**C**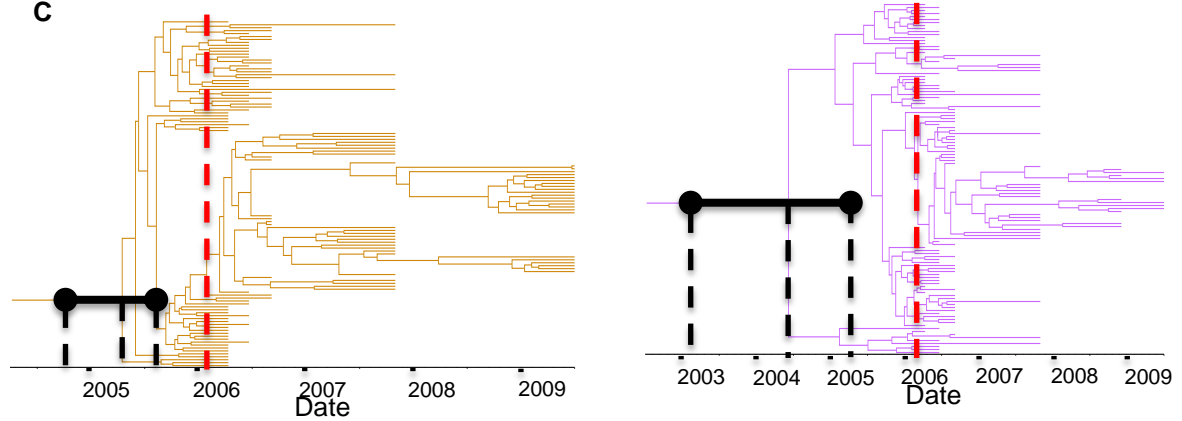**D**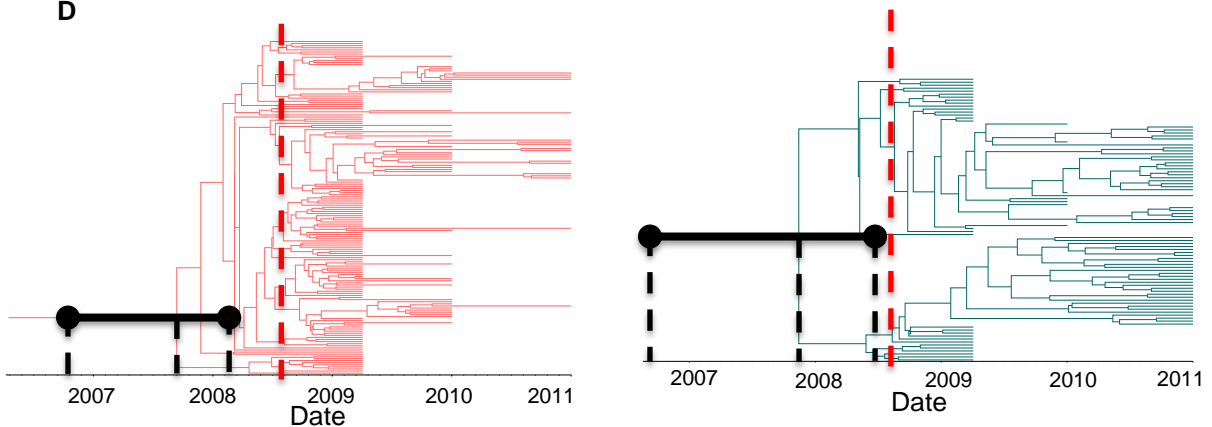

Supplement: NIHMS679625-supplement-6.pdf [file NIHMS679625-supplement-6.pdf]
